# Supplementary material for: The major histocompatibility complex (Mhc) class IIB region has greater genomic structural flexibility and diversity in the quail than the chicken
Source: PubMed Central journal article supplement (PMC1769493; doi:10.1186/1471-2164-7-322), 2006-12-21

**Additional file 2. Dot-matrix analysis among five *Coja* haplotypes (A ~ J), between quail and chicken (K) and between chicken *B12* and *B21* (L).**

(A) HT1 vs HT2

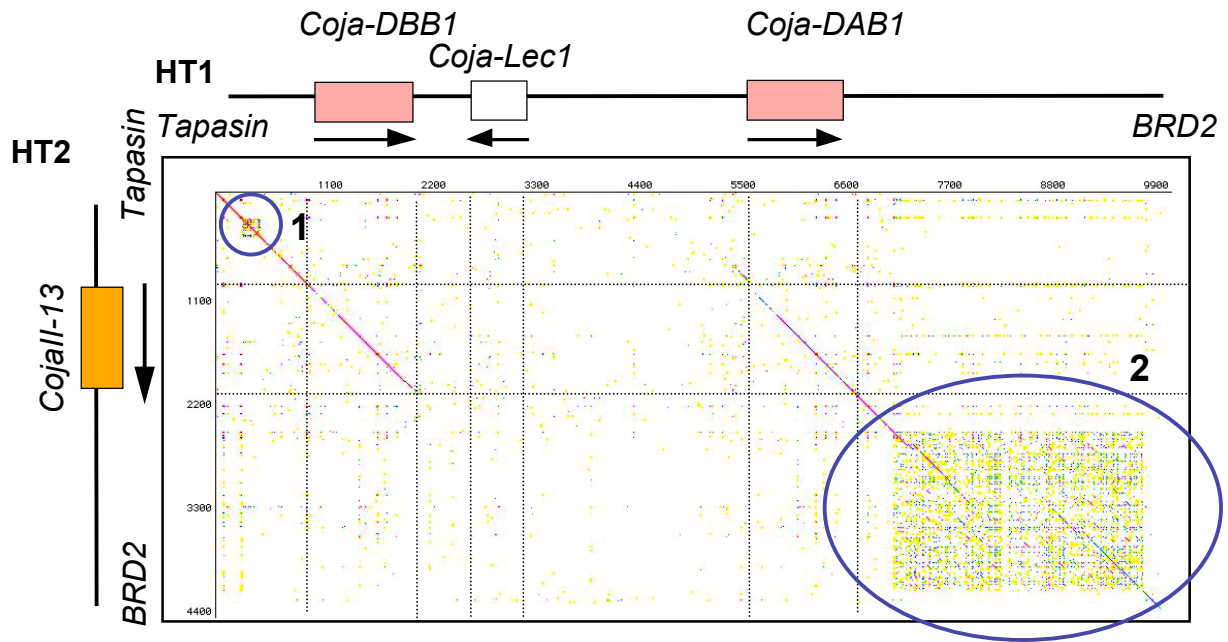

(B) HT1 vs HT3

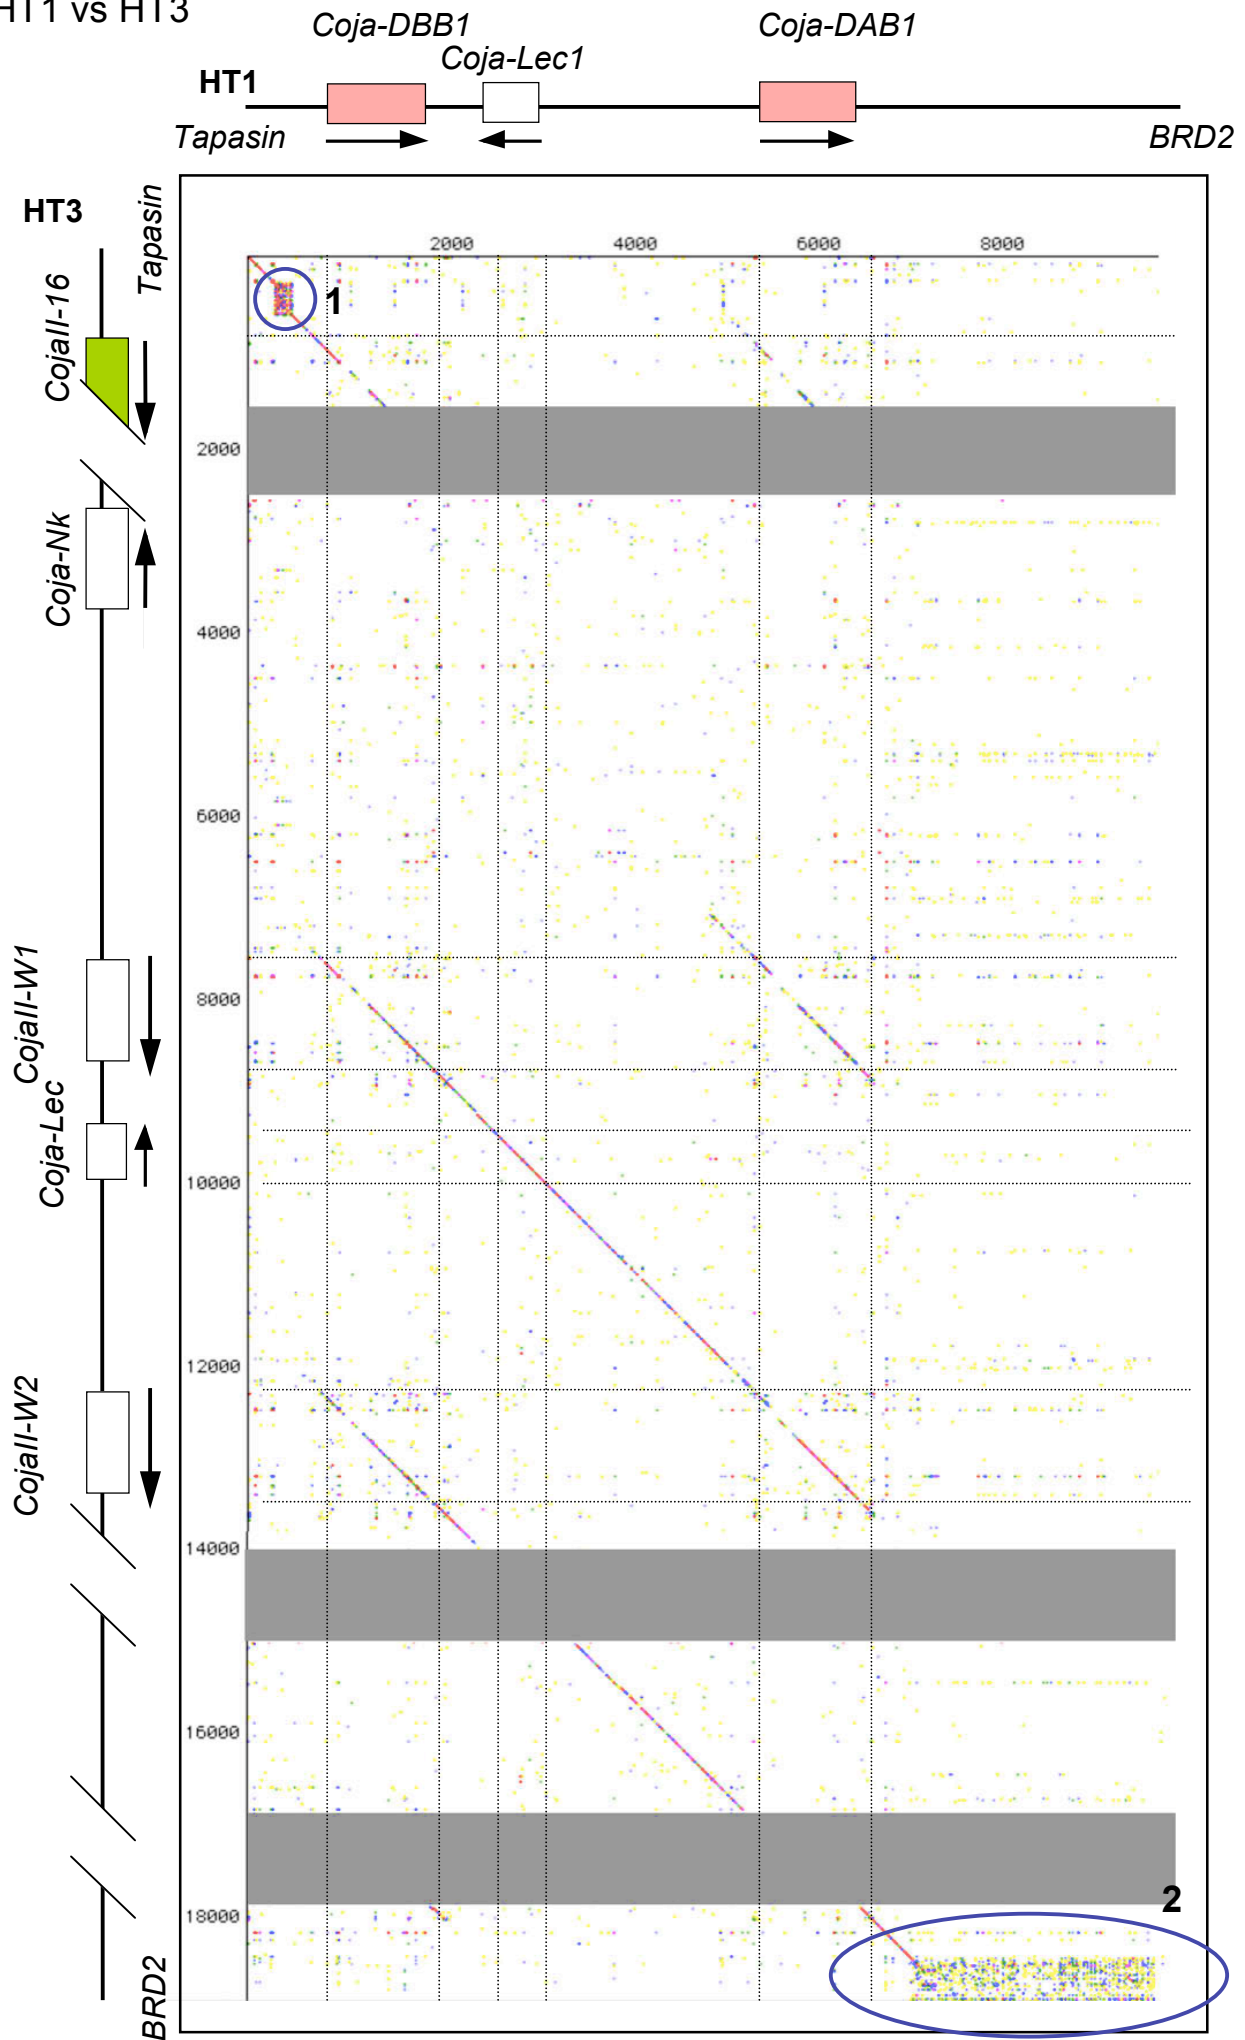

(C) HT1 vs HT4

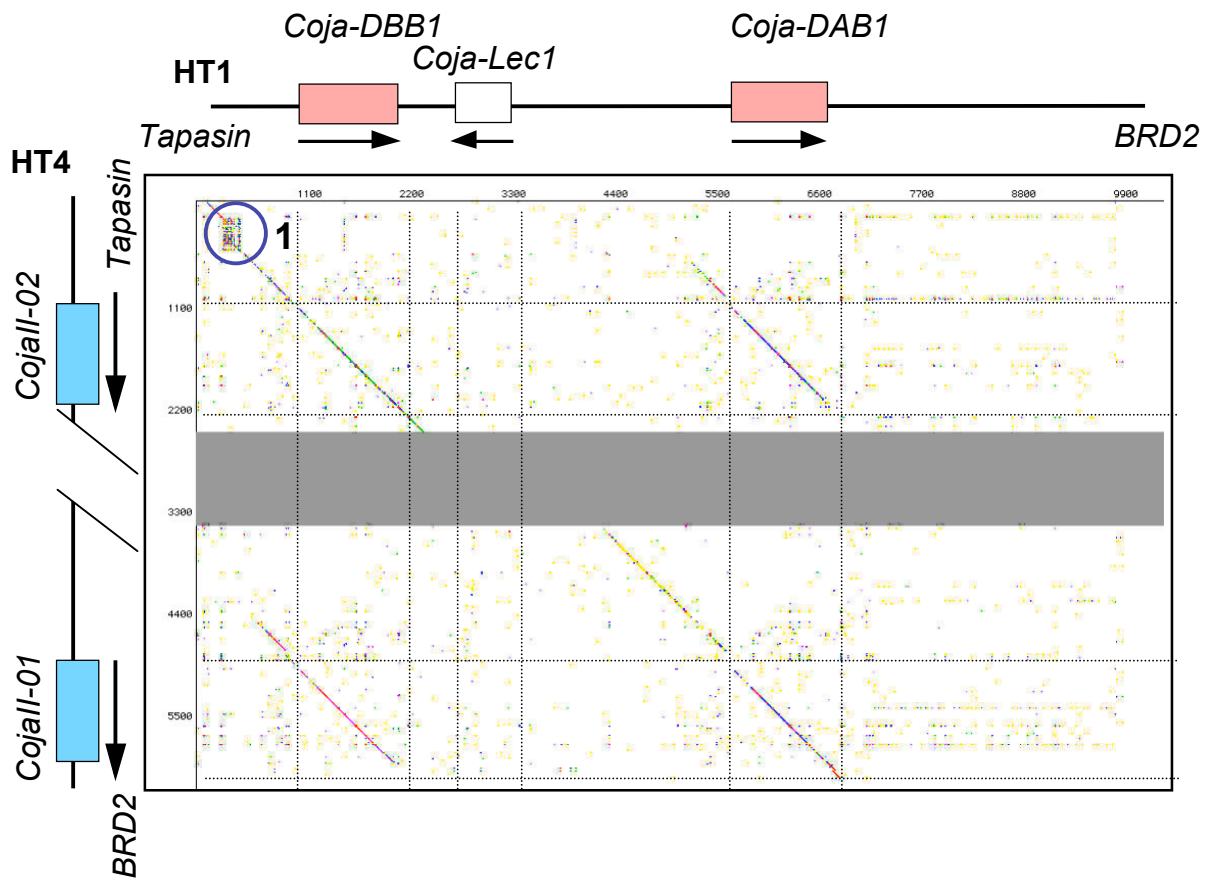

(D) HT1 vs HT5

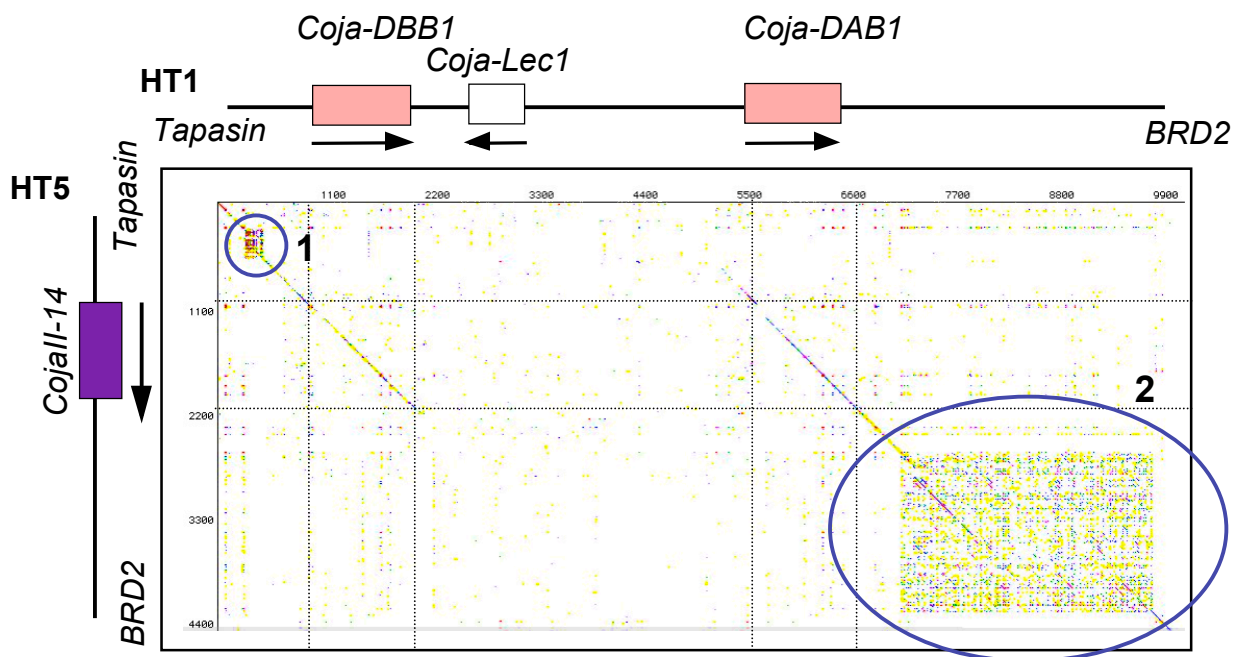

(E) HT2 vs HT3

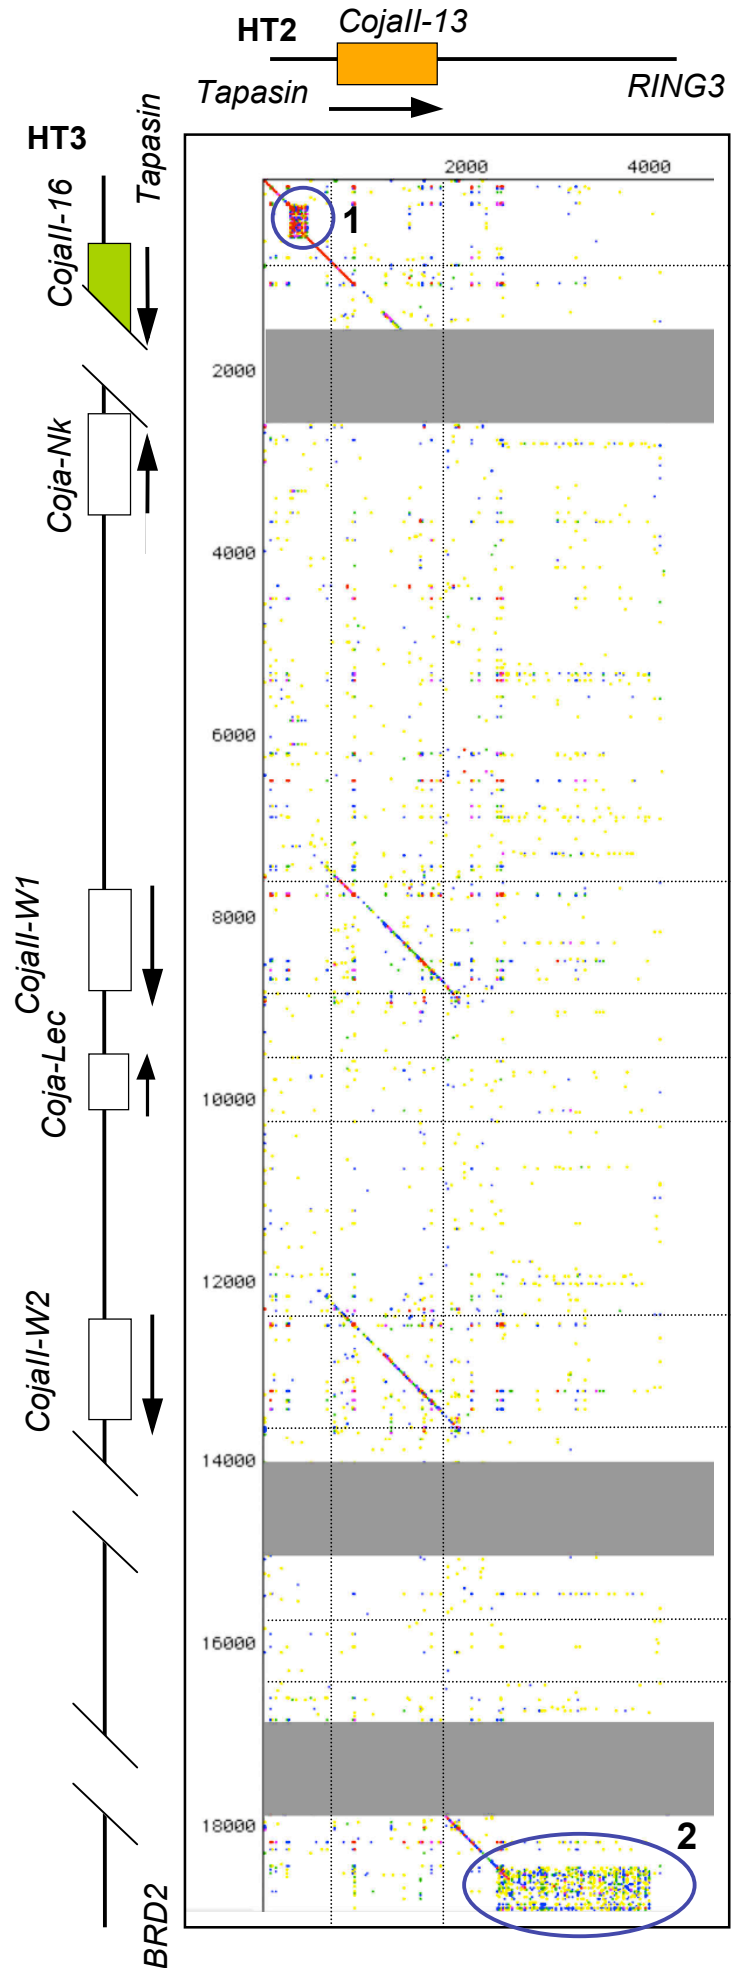

(F) HT2 vs HT4

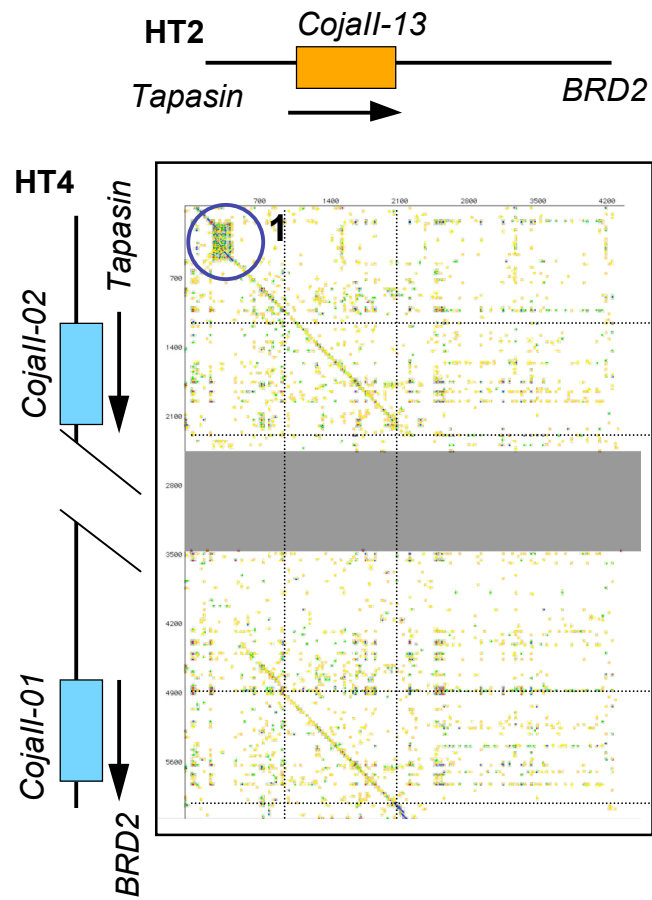

(G) HT2 vs HT5

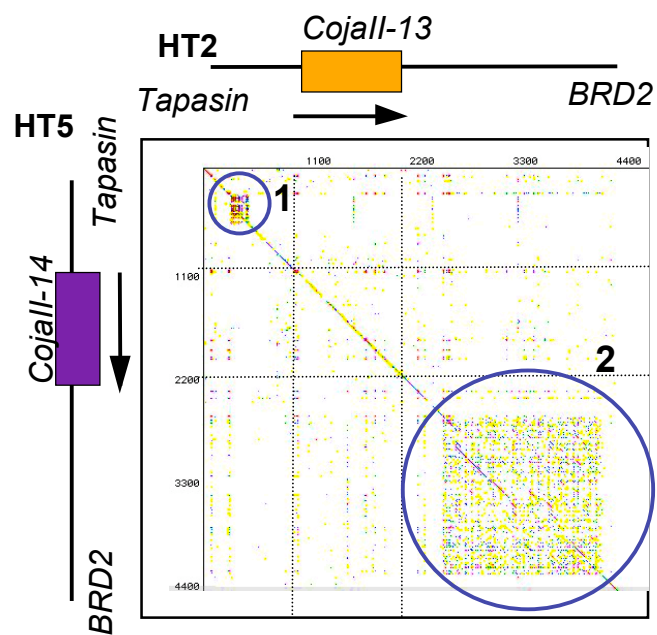

(H) HT3 vs HT4

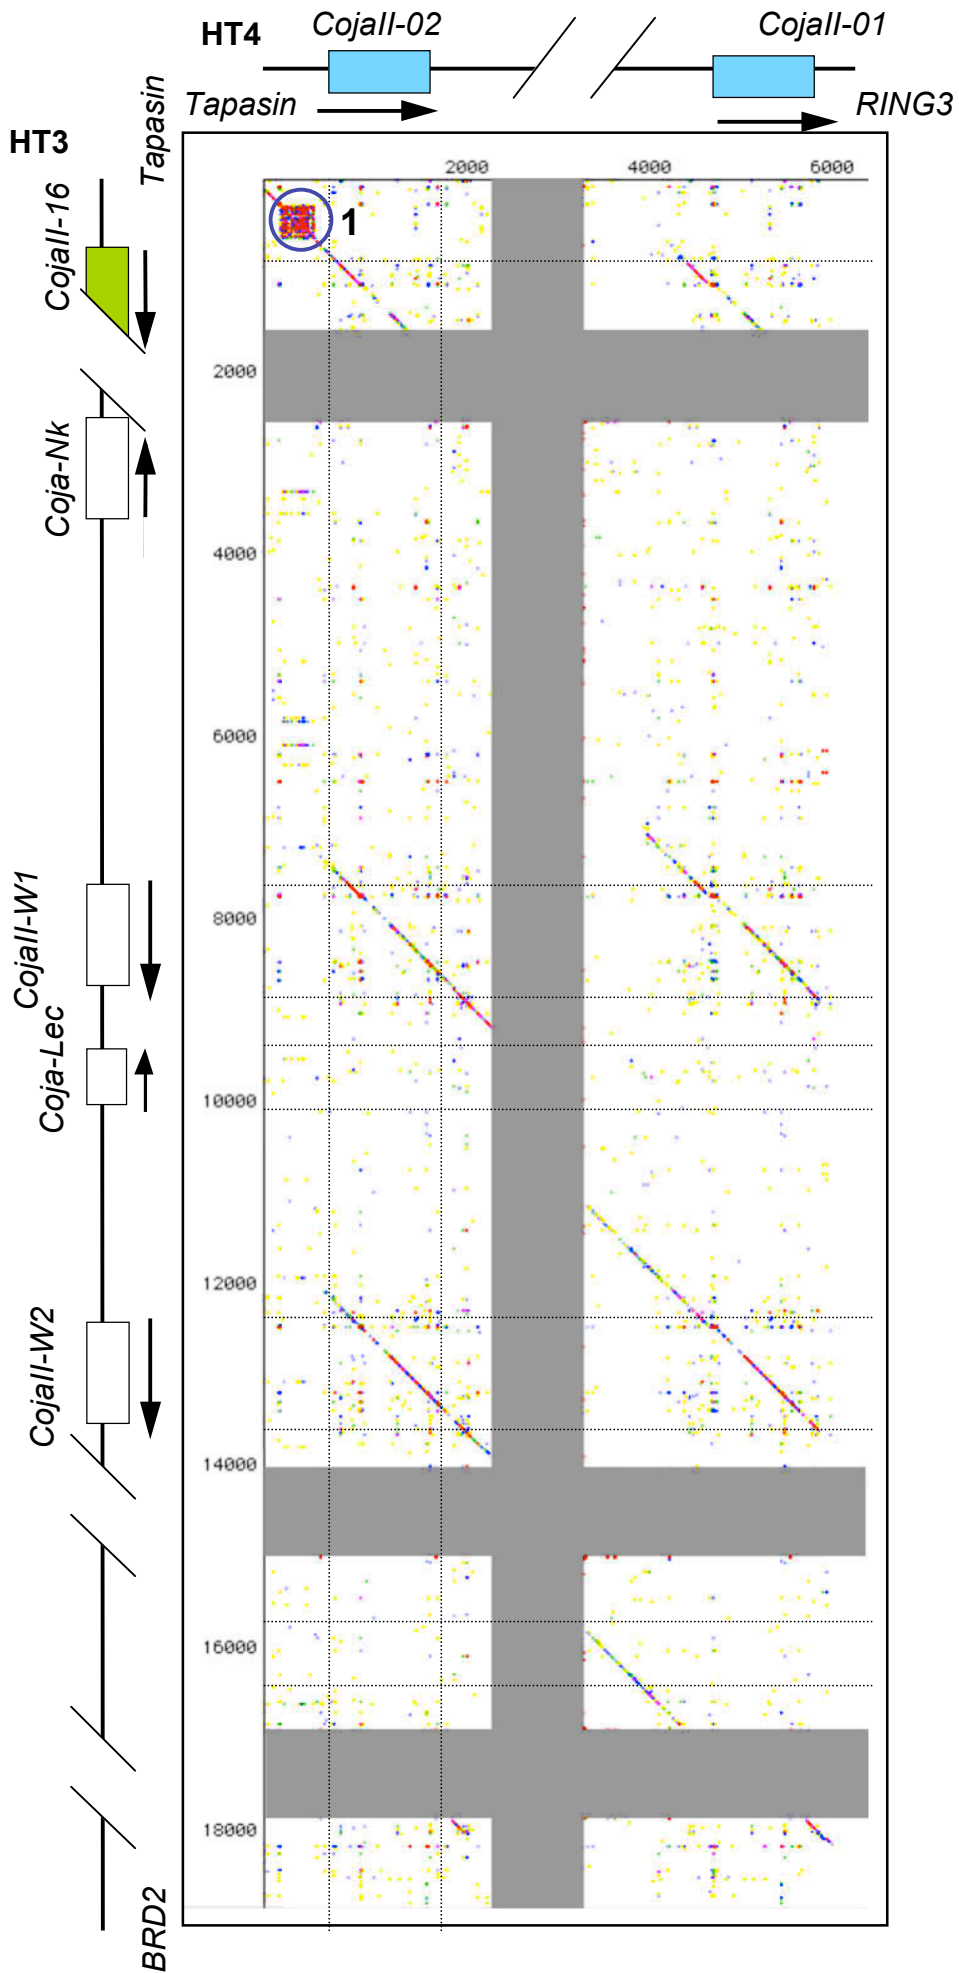

(I) HT3 vs HT5

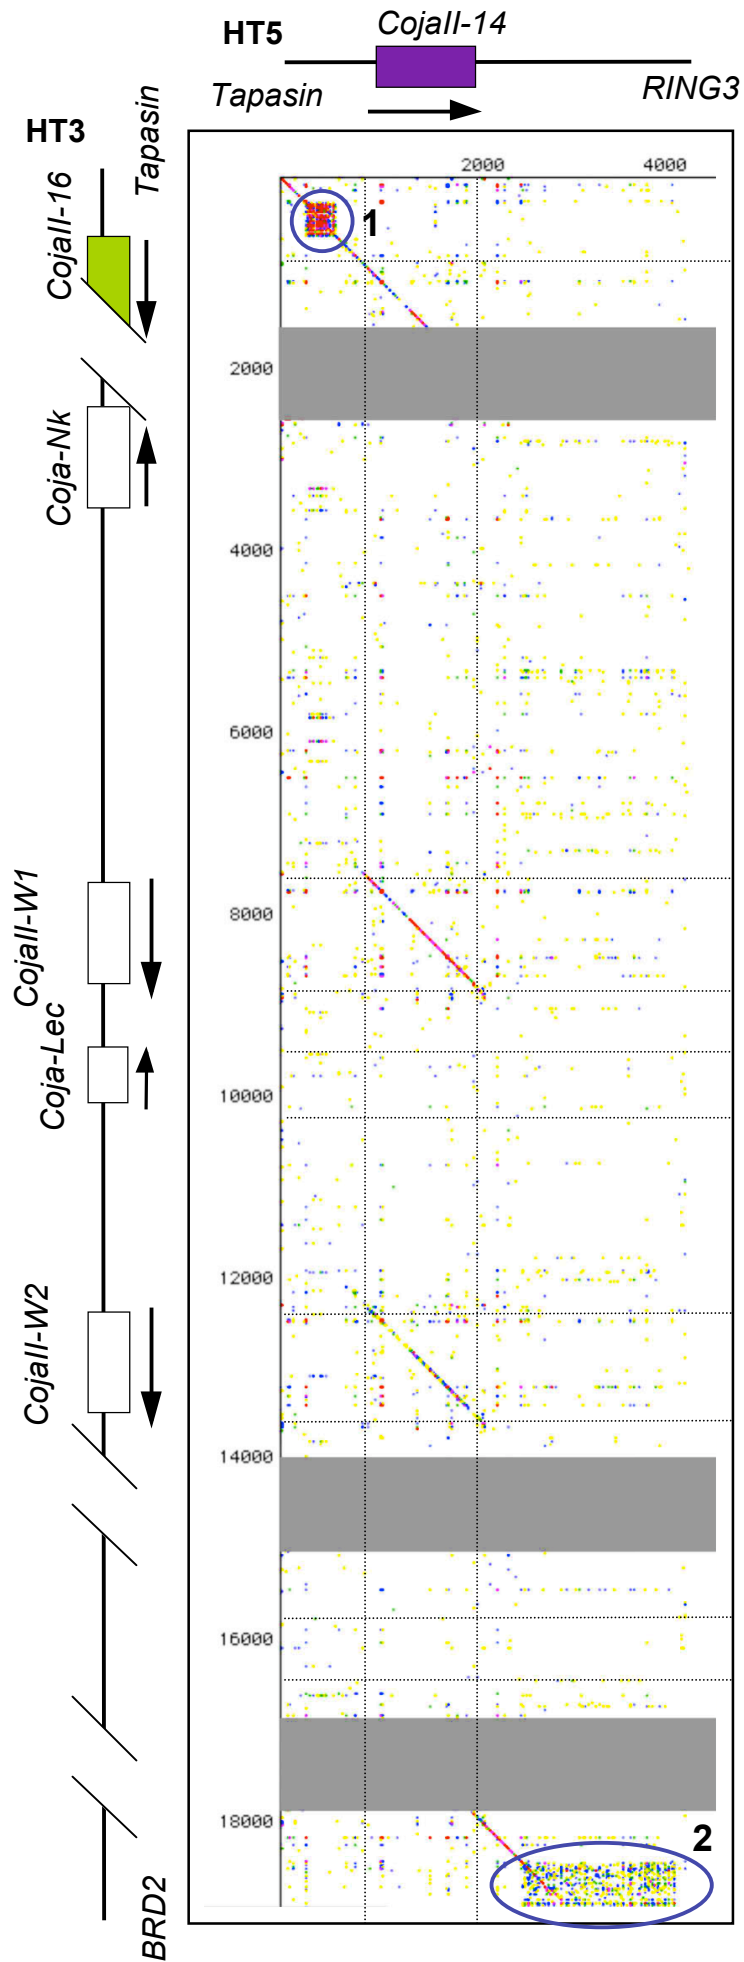

(J) HT4 vs HT5

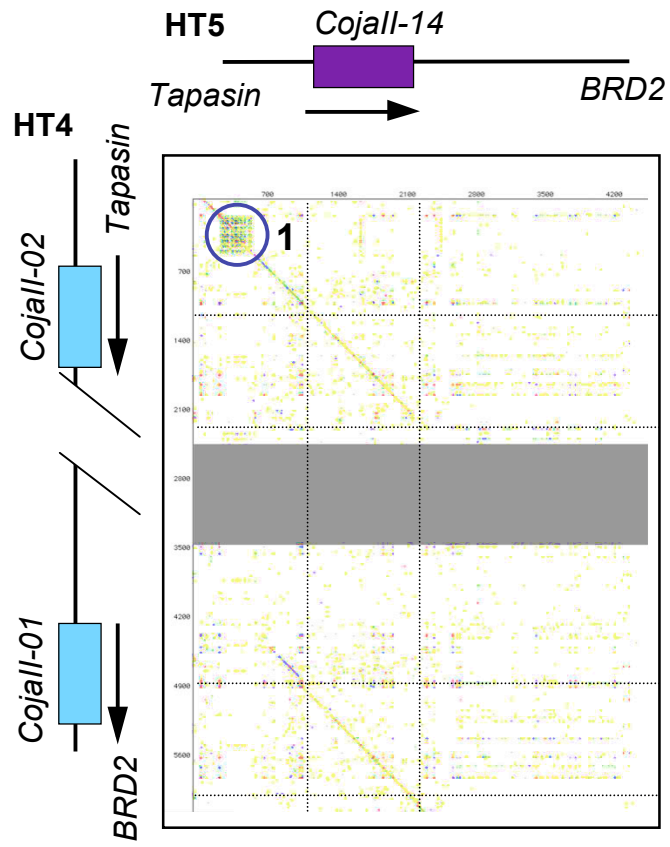



(K) HT2 vs B12

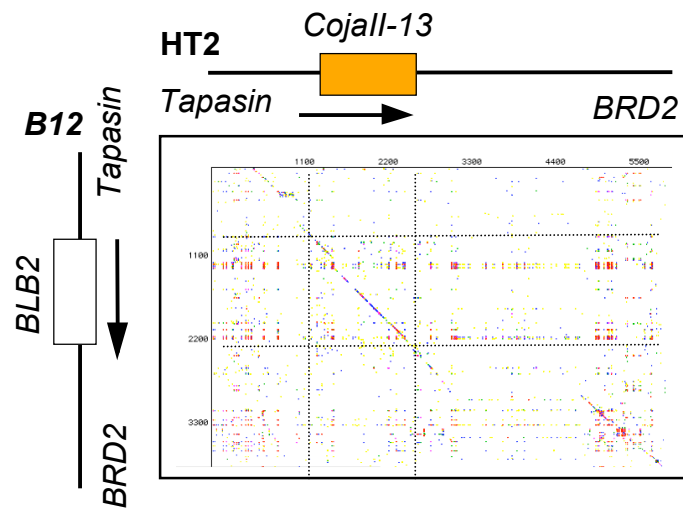

(L) B12 vs B21

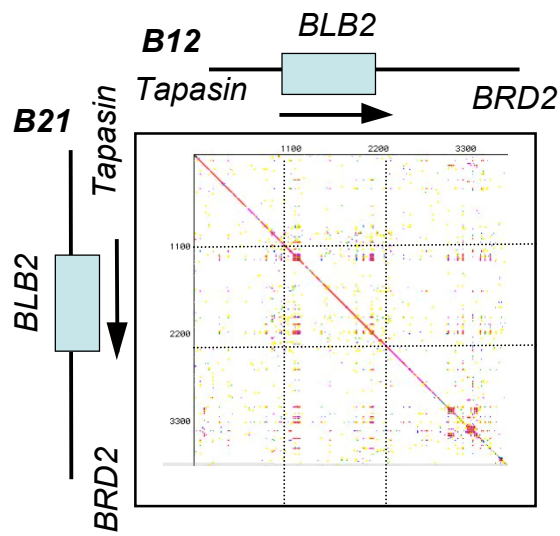

Supplement: 1471-2164-7-322-S2.pdf [file 1471-2164-7-322-S2.pdf]
