# Supplementary material for: The major histocompatibility complex (Mhc) class IIB region has greater genomic structural flexibility and diversity in the quail than the chicken
Source: BMC Genomics. 2006 Dec 21;7:322. doi: 10.1186/1471-2164-7-322 (PMC1769493; doi:10.1186/1471-2164-7-322)
Supplement: Additional file 1 — Alignment of transcribed CojaIIBs for phylogenetic analysis. the nucleotide sequences of the β1 extracellular domain regions (exon 2) (270 nucleotides in length) of MhcIIB genes for the 16 CojaIIBs the chicken haplotypic BLB sequences on B2 B4 B12 B14 B15 B19 and B21. [file 1471-2164-7-322-S1.pdf]

### Additional file 1. Alignment of transcribed *CojallBs* for phylogenetic analysis

|              |     |                                                                                                        |     |
|--------------|-----|--------------------------------------------------------------------------------------------------------|-----|
| Cojo-DAB1*01 | 1   | CGTTCCTCTCTTCAGATATGCTGTCTGAGTGCCAGTTTCTTCAACGGCACCCGAGCGGGTAAGGTTGACGACGGGGTACATCTACAACCGGCAGCAGTACAC | 100 |
| Cojo-DDB1*01 | 1   | ...A...AG...TTA.CGTGA...C...A...G...A...TGT.GT...                                                      | 100 |
| Cojo-DCB1*01 | 1   | ...AA.GGCTGGGTAGAG.G...G...T...C.G...C...G...A.ATGTAG.TA.C...T...TA.T                                  | 100 |
| Cojo-DEB1*01 | 1   | ...G...AG.GGTC.T.TA.AG.G...C...C...G...A...GT.GT...                                                    | 100 |
| Cojo-DFB1*01 | 1   | ...T...TAT...GTC.CACAGA...GC.G...A.C...G...AT...A...                                                   | 100 |
| Cojo-DFB1*02 | 1   | ...T...TAT...GTC.CACAGA...GC...A.C...G...AT...A.A...                                                   | 100 |
| Cojo-DGB1*01 | 1   | ...G...AG.GGTC.T.TA.AG.G...G...C.C...G...A.TGT.G.TAC...T                                               | 100 |
| Cojo-DGB1*02 | 1   | ...G...AG.GGTC.T.TA.AG.G...G...C.C...G...A.TGT.G.TAC...AT...                                           | 100 |
| CojoII-01    | 1   | ...A...AGCATTCT.TA.A.G...G...C.C.G...C...G...GT.G.CC...T...                                            | 100 |
| CojoII-02    | 1   | ...AAG...TC.CATAGA.GG...GC.TC.G...A.TG.G...GT.GC...                                                    | 100 |
| CojoII-04    | 1   | ...A.CA...TC.CAA...C...C.C.G...C...G...A.AGT.G.CA...C.CT...                                            | 100 |
| CojoII-13    | 1   | ...A.CA...GC.AAA...C...C.C.G...C...G...GT...T.G...                                                     | 100 |
| CojoII-14    | 1   | ...AACATTCT.T.A.TGGG...T.C.C.G...C...G...GT...T.G...                                                   | 100 |
| CojoII-16    | 1   | ...AACAT.C.T.TA.TGGG...T.C.C.G...C...G...GTGT.GT.A...                                                  | 100 |
| CojoII-17    | 1   | ...A.CA...GC.AAAG...T...T.C...C...G...AC.TCT.G.TA...T...                                               | 100 |
| Cojo-DAB1*01 | 101 | ACACTTCGACAGCGACGTGGGGAAATTCGTGGCCGATTCAACGCTGGGAGAGCGTCCGACTGAGTACTTAAMACAGCCAAACCGAGTTTCTGGAGTACTTA  | 200 |
| Cojo-DDB1*01 | 101 | G...T...G...A.C.T...T...A.G.C...C...A.C...G...TAC...                                                   | 200 |
| Cojo-DCB1*01 | 101 | G...T...AT...C...C...G...TG.AAG...C...C...G.C...A.AA...                                                | 200 |
| Cojo-DEB1*01 | 101 | G...A...T...T...A.C.A...A.TG.G...G...G.T...A.AC...T.C...                                               | 200 |
| Cojo-DFB1*01 | 101 | G...A...T...T...A.C...C...TT.A.G...C...AC...G.T...A...GT.AA...                                         | 200 |
| Cojo-DFB1*02 | 101 | G...A...T...T...A.C...C...TT.A.G...C...AC...G.T...A...GT.AA...                                         | 200 |
| Cojo-DGB1*01 | 101 | G...T...T...A.C.A...A.TG.G...G...C...G.T...A.AC...T.C...                                               | 200 |
| Cojo-DGB1*02 | 101 | G...T...T...A.C.A...A.TG.G...G...C...G.T...A.AC...T.C...                                               | 200 |
| CojoII-01    | 101 | G...T...AT...A.C...A.G...GG...A...G.TGC...                                                             | 200 |
| CojoII-02    | 101 | G...T...T...A...TT.A.G...C.CAC...                                                                      | 200 |
| CojoII-04    | 101 | G...T...T...A.C.A...A.TG.G.A.G...C...A.C...A...CGTGC...                                                | 200 |
| CojoII-13    | 101 | G...T...T...A.TG.G...G.G.C...                                                                          | 200 |
| CojoII-14    | 101 | G...T...T...A.TG.G...G.G.C...                                                                          | 200 |
| CojoII-16    | 101 | G...T...T...A.C...G...GG...T...G.C...GAAA...TAG...                                                     | 200 |
| CojoII-17    | 101 | G...T...T...A.C.A...A.TG.G...G...GG...G...A...GT.AA...                                                 | 200 |
| Cojo-DAB1*01 | 201 | CGGGGTGTAGTAGGACCTGTCTGCCGGCACAACTACGAGATTTCTGGAGTCCATACGGGTGCAGAGGAGCG                                | 270 |
| Cojo-DDB1*01 | 201 | ...C...A...G...GT.T...                                                                                 | 270 |
| Cojo-DCB1*01 | 201 | ...ACAG...G.AT...TT...G.GC.G.T...C.G.A...C...                                                          | 270 |
| Cojo-DEB1*01 | 201 | ...TC...T...GT.GC...T...                                                                               | 270 |
| Cojo-DFB1*01 | 201 | ...CA.A...T...G.G.GT.C...                                                                              | 270 |
| Cojo-DFB1*02 | 201 | ...CA.A...T...G.G.GT.C...                                                                              | 270 |
| Cojo-DGB1*01 | 201 | ...T...T...GT.GC...GG...T...                                                                           | 270 |
| Cojo-DGB1*02 | 201 | ...T...T...GT.GC...GG...T...                                                                           | 270 |
| CojoII-01    | 201 | ...A.C...A...T...G.G.GGAT...C.T...                                                                     | 270 |
| CojoII-02    | 201 | ...A.C...GT...T...                                                                                     | 270 |
| CojoII-04    | 201 | ...A.C...TG...T...G.G.GT.C...                                                                          | 270 |
| CojoII-13    | 201 | ...C...T...G.G.GGA...T...                                                                              | 270 |
| CojoII-14    | 201 | ...C...T...C.T...                                                                                      | 270 |
| CojoII-16    | 201 | A...AA.AG...T...G.G.GT.C...T...                                                                        | 270 |
| CojoII-17    | 201 | ...CA.A...GT...T...T...                                                                                | 270 |
